# Supplementary material
Source: PubMed Central journal article supplement (PMC6068021)
Supplement: 2017.187302.BAER_SUPPL.pdf [file 2017.187302.BAER_SUPPL.pdf]

## **Molecular genetic characterization of myeloid/ lymphoid neoplasms associated with eosinophilia and rearrangement of PDGFRA, PDGFRB, FGFR1 or PCM1-JAK2**

---

*Constance Baer, Verena Muehlbacher, Wolfgang Kern, Claudia Haferlach and Torsten Haferlach*

*MLL Munich Leukemia Laboratory, Germany*

*Correspondence: [constance.baer@mll.com](mailto:constance.baer@mll.com)*

*doi:10.3324/haematol.2017.187302*

## **Supplemental Material**

**Molecular genetic characterization of myeloid/lymphoid neoplasms associated with eosinophilia and rearrangement of *PDGFRA*, *PDGFRB*, *FGFR1* or *PCM1-JAK2***

Constance Baer, Verena Muehlbacher, Wolfgang Kern, Claudia Haferlach, Torsten Haferlach

**Table S1**

|                                           | <i>PDGFRA</i>                                              | <i>PDGFRB</i>                                                                                                                                | <i>FGFR1</i>                                                                 | <i>PCM1-JAK2</i>          |
|-------------------------------------------|------------------------------------------------------------|----------------------------------------------------------------------------------------------------------------------------------------------|------------------------------------------------------------------------------|---------------------------|
| <b>total cohort (n=)</b>                  | 35                                                         | 13                                                                                                                                           | 6                                                                            | 7                         |
| <b>sex (male/female)</b>                  | 33/2                                                       | 12/1                                                                                                                                         | 5/1                                                                          | 6/1                       |
| <b>age in years, median [range]</b>       | 49<br>[23-76]                                              | 52<br>[33-70]                                                                                                                                | 60<br>[48-74]                                                                | 61<br>[49-78]             |
| <b>rearrangement type</b>                 | <i>FIP1L1-PDGFR</i><br>(n=34)<br><i>BCR-PDGFR</i><br>(n=1) | <i>ETV6-PDGFR</i><br>(n=7)<br><i>EBF1-PDGFR</i><br>(n=1)<br><i>TNIP1-PDGFR</i><br>(n=1)<br><i>CCDC88C-PDGFR</i><br>(n=1)<br>unknown<br>(n=3) | <i>ZMYM2-FGFR1</i><br>(n=4)<br><i>BCR-FGFR1</i><br>(n=1)<br>unknown<br>(n=1) | <i>PCM1-JAK2</i><br>(n=7) |
| <b>detection method for rearrangement</b> |                                                            |                                                                                                                                              |                                                                              |                           |
| <b>RT-PCR</b>                             | 35                                                         | 9                                                                                                                                            | 5                                                                            | 7                         |
| <b>FISH</b>                               | 21                                                         | 11                                                                                                                                           | 6                                                                            | 7                         |
| <b>chromosome banding</b>                 | x                                                          | 6                                                                                                                                            | 6                                                                            | 7                         |
| <b>targeted fusion panel</b>              |                                                            | 2                                                                                                                                            |                                                                              |                           |

**Table S1: Patient characteristics.** All known rearrangements were detected by reverse transcriptase PCR (RT-PCR). If possible, FISH and chromosome banding analysis was performed, too.<sup>1-6</sup> The *CCDC88C-PDGFRB* rearrangement was resolved using TruSight RNA Fusion Panel (Illumina, San Diego, CA).<sup>7</sup> Four aberrations are listed as unknown. By FISH involvement of *PDGFRB* and *FGFR1* were detected using break-apart probes.

1. Cools J, DeAngelo DJ, Gotlib J, Stover EH, Legare RD, Cortes J, et al. A tyrosine kinase created by fusion of the *PDGFRA* and *FIP1L1* genes as a therapeutic target of imatinib in idiopathic hypereosinophilic syndrome. *N Engl J Med* 2003; **348**: 1201-1214.
2. Apperley JF, Gardembas M, Melo JV, Russell-Jones R, Bain BJ, Baxter EJ, et al. Response to imatinib mesylate in patients with chronic myeloproliferative diseases with rearrangements of the platelet-derived growth factor receptor beta. *N Engl J Med* 2002; **347**: 481-487.
3. Reiter A, Sohal J, Kulkarni S, Chase A, Macdonald DH, Aguiar RC, et al. Consistent fusion of *ZNF198* to the fibroblast growth factor receptor-1 in the t(8;13)(p11;q12) myeloproliferative syndrome. *Blood* 1998; **92**: 1735-1742.
4. Roberts KG, Li Y, Payne-Turner D, Harvey RC, Yang YL, Pei D, et al. Targetable kinase-activating lesions in Ph-like acute lymphoblastic leukemia. *N Engl J Med* 2014; **371**: 1005-1015.
5. Demiroglu A, Steer EJ, Heath C, Taylor K, Bentley M, Allen SL, et al. The t(8;22) in chronic myeloid leukemia fuses *BCR* to *FGFR1*: transforming activity and specific inhibition of *FGFR1* fusion proteins. *Blood* 2001; **98**: 3778-3783.
6. Patterer V, Schnittger S, Kern W, Haferlach T, Haferlach C. Hematologic malignancies with *PCM1-JAK2* gene fusion share characteristics with myeloid and lymphoid neoplasms with eosinophilia and abnormalities of *PDGFRA*, *PDGFRB*, and *FGFR1*. *Ann Hematol* 2013; **92**: 759-769.
7. Stengel A, Nadarajah N, Haferlach T, Dicker F, Kern W, Meggendorfer M, et al. Detection of recurrent and of novel fusion transcripts in myeloid malignancies by targeted RNA Sequencing. *Leukemia*. 2018 Feb 26. [Epub ahead of print].

**Table S2**

| Final diagnosis at time of routine assessment* | Fusion           | Gender | Age in years | WBC [x10 <sup>9</sup> /L] | Platelets [x 10 <sup>9</sup> /L] | Hemoglobin [g/dL] | PB Eos (%) | Mutation |
|------------------------------------------------|------------------|--------|--------------|---------------------------|----------------------------------|-------------------|------------|----------|
| AL                                             | <i>PDGFRB</i>    | m      | 52           | N.A.                      | N.A.                             | N.A.              | N.A.       |          |
| ALL                                            | <i>PDGFRB</i>    | m      | 33           | 6.90                      | 23                               | 7.7               | N.A.       | y        |
| ALL                                            | <i>FGFR1</i>     | m      | 68           | 56.20                     | 20                               | 15.9              | 4          |          |
| AML                                            | <i>PCM1-JAK2</i> | m      | 61           | 17.80                     | 90                               | 12.7              | 5          |          |
| AML                                            | <i>PDGFRB</i>    | f      | 69           | 5.60                      | 60                               | 9.4               | 2          | y        |
| AML                                            | <i>PCM1-JAK2</i> | m      | 73           | 6.59                      | 108                              | 8.1               | 8          |          |
| CEL                                            | <i>PDGFRA</i>    | m      | 40           | N.A.                      | N.A.                             | N.A.              | N.A.       |          |
| HES                                            | <i>PDGFRA</i>    | m      | 23           | 28.30                     | 76                               | 8.8               | N.A.       |          |
| HES                                            | <i>PDGFRA</i>    | m      | 24           | 55.70                     | 53                               | 14                | 74         |          |
| HES                                            | <i>PDGFRA</i>    | m      | 31           | 14.00                     | 185                              | 13.4              | 71         |          |
| HES                                            | <i>PDGFRA</i>    | m      | 33           | 41.53                     | 135                              | 10.4              | 62         |          |
| HES                                            | <i>PDGFRA</i>    | m      | 34           | 15.40                     | 118                              | 12.2              | 39         |          |
| HES                                            | <i>PDGFRA</i>    | m      | 39           | 8.30                      | 141                              | 11.4              | 16         | y        |
| HES                                            | <i>PDGFRA</i>    | m      | 39           | 9.86                      | 157                              | 8.9               | 19         |          |
| HES                                            | <i>PDGFRA</i>    | m      | 39           | N.A.                      | N.A.                             | N.A.              | N.A.       |          |
| HES                                            | <i>PDGFRA</i>    | m      | 40           | 7.88                      | 302                              | 13.7              | 9          |          |
| HES                                            | <i>PDGFRA</i>    | m      | 41           | 26.00                     | 94                               | 10.9              | 70         |          |
| HES                                            | <i>PDGFRA</i>    | m      | 41           | 8.80                      | 220                              | 15.1              | 51         |          |
| HES                                            | <i>PDGFRA</i>    | m      | 46           | 6.90                      | 186                              | 14.2              | 16         |          |
| HES                                            | <i>PDGFRA</i>    | m      | 47           | 37.70                     | 250                              | 14.5              | 47         |          |
| HES                                            | <i>PDGFRA</i>    | m      | 47           | 8.00                      | 184                              | N.A.              | N.A.       |          |
| HES                                            | <i>PDGFRA</i>    | m      | 48           | N.A.                      | N.A.                             | N.A.              | 65         |          |
| HES                                            | <i>PDGFRA</i>    | m      | 49           | 80.60                     | 133                              | 13.9              | 24         |          |
| HES                                            | <i>PDGFRA</i>    | m      | 49           | 29.00                     | 188                              | 15.2              | 52         |          |
| HES                                            | <i>PDGFRA</i>    | m      | 50           | 25.50                     | 117                              | 9.5               | 34         |          |
| HES                                            | <i>PDGFRA</i>    | m      | 50           | N.A.                      | N.A.                             | N.A.              | 67         |          |
| HES                                            | <i>PDGFRB</i>    | m      | 51           | N.A.                      | N.A.                             | N.A.              | 63         |          |
| HES                                            | <i>PDGFRA</i>    | m      | 53           | 20.00                     | 81                               | 11.8              | 53         |          |
| HES                                            | <i>PDGFRA</i>    | m      | 55           | 10.91                     | 148                              | 12.3              | 60         |          |
| HES                                            | <i>PDGFRA</i>    | f      | 56           | 12.00                     | 135                              | 14.2              | 48         |          |
| HES                                            | <i>PDGFRA</i>    | m      | 57           | 14.66                     | 343                              | 12.5              | 50         |          |
| HES                                            | <i>PDGFRB</i>    | m      | 59           | N.A.                      | N.A.                             | N.A.              | N.A.       | y        |
| HES                                            | <i>PDGFRA</i>    | m      | 61           | 34.80                     | 175                              | 16.6              | 75         |          |
| HES                                            | <i>PDGFRB</i>    | m      | 62           | 20.60                     | 204                              | 12.5              | 78         |          |
| HES                                            | <i>PDGFRA</i>    | m      | 64           | 19.00                     | 350                              | 12.9              | N.A.       |          |
| HES                                            | <i>PDGFRA</i>    | m      | 65           | 16.70                     | 226                              | 13.7              | N.A.       | y        |
| HES                                            | <i>PDGFRA</i>    | m      | 66           | 7.30                      | 181                              | N.A.              | 47         |          |
| HES                                            | <i>PDGFRA</i>    | m      | 68           | 8.10                      | 197                              | 14.4              | N.A.       | y        |
| HES                                            | <i>PDGFRA</i>    | m      | 70           | 9.80                      | 201                              | N.A.              | 54         |          |
| HES                                            | <i>PDGFRA</i>    | m      | 73           | N.A.                      | N.A.                             | N.A.              | 58         | y        |
| HES                                            | <i>PDGFRA</i>    | f      | 74           | 20.00                     | N.A.                             | 9.01              | 60         |          |
| HES                                            | <i>PDGFRA</i>    | m      | 76           | 10.30                     | 327                              | 13.2              | 87         |          |
| MDS/MPN                                        | <i>PDGFRB</i>    | m      | 49           | N.A.                      | N.A.                             | N.A.              | N.A.       |          |
| MDS/MPN                                        | <i>FGFR1</i>     | f      | 52           | N.A.                      | N.A.                             | N.A.              | 14         | y        |
| MDS/MPN                                        | <i>PDGFRA</i>    | m      | 57           | 129.40                    | 124                              | 12.1              | 20         | y        |
| MDS/MPN                                        | <i>PDGFRB</i>    | m      | 70           | 6.64                      | 118                              | 12.7              | 6          |          |
| MPN                                            | <i>PDGFRA</i>    | m      | 45           | 4.20                      | 134                              | 13.5              | 45         |          |
| MPN                                            | <i>PDGFRB</i>    | m      | 46           | 58.20                     | 115                              | 10.1              | 21         |          |
| MPN                                            | <i>FGFR1</i>     | m      | 48           | N.A.                      | N.A.                             | N.A.              | 7          | y        |
| MPN                                            | <i>PCM1-JAK2</i> | m      | 49           | 27.80                     | 96                               | 14                | 1          |          |
| MPN                                            | <i>PDGFRB</i>    | m      | 50           | 7.70                      | 337                              | 9.1               | N.A.       |          |
| MPN                                            | <i>PCM1-JAK2</i> | m      | 50           | 13.17                     | 246                              | 10.8              | 25         |          |
| MPN                                            | <i>PCM1-JAK2</i> | m      | 50           | 9.90                      | 145                              | 12                | 6          |          |
| MPN                                            | <i>PDGFRB</i>    | m      | 51           | 41.90                     | 143                              | 12.8              | N.A.       |          |
| MPN                                            | <i>FGFR1</i>     | m      | 53           | 45.00                     | 140                              | 16                | 15         | y        |
| MPN                                            | <i>PDGFRB</i>    | m      | 53           | 112.00                    | 52                               | 10.4              | 25         |          |
| MPN                                            | <i>PDGFRB</i>    | m      | 58           | 24.50                     | 213                              | 16.5              | 4          |          |
| MPN                                            | <i>PCM1-JAK2</i> | f      | 68           | 5.30                      | 213                              | N.A.              | 1          |          |
| MPN                                            | <i>FGFR1</i>     | m      | 70           | 104.20                    | 217                              | 9.7               | N.A.       | y        |
| MPN                                            | <i>FGFR1</i>     | m      | 74           | 52.01                     | N.A.                             | N.A.              | N.A.       | y        |
| N.A.                                           | <i>PCM1-JAK2</i> | m      | 78           | N.A.                      | N.A.                             | N.A.              | N.A.       | y        |

**Table S2: Patient characteristics.** \*Samples were collected from 2006-2016. The diagnosis assigned at the respective time is given. Abbreviations: Acute leukemia, AL; acute lymphoblastic leukemia, ALL; acute myeloid leukemia, AML; chronic eosinophilic leukemia, CEL; hypereosinophilic syndrome; HES; myelodysplastic/myeloproliferative neoplasms, MDS/MPN; myeloproliferative neoplasms, MPN; not available; N.A.; male, m; female, f; white blood cells, WBC; eosinophils in peripheral blood, PB Eos; mutation present, y(es).

**Table S3**

| gene            | region of interest*     | transcript ID   |
|-----------------|-------------------------|-----------------|
| <i>ASXL1</i>    | E13                     | ENST00000375687 |
| <i>BCL2</i>     | E01                     | ENST00000398117 |
| <i>BCOR</i>     | coding region           | ENST00000378444 |
| <i>BIRC3</i>    | coding region           | ENST00000263464 |
| <i>BRAF</i>     | E15                     | ENST00000288602 |
| <i>BTK</i>      | E15                     | ENST00000308731 |
| <i>CALR</i>     | E09                     | ENST00000316448 |
| <i>CBL</i>      | E08-E09                 | ENST00000264033 |
| <i>CSF3R</i>    | E14, E17                | ENST00000373106 |
| <i>CSNK1A1</i>  | E03-E04                 | ENST00000373106 |
| <i>CXCR4</i>    | E02                     | ENST00000241393 |
| <i>DNMT3A</i>   | E07-23                  | ENST00000264709 |
| <i>EGR2</i>     | E01-02                  | ENST00000242480 |
| <i>ETNK1</i>    | E03                     | ENST00000266517 |
| <i>ETV6</i>     | coding region           | ENST00000396373 |
| <i>EZH2</i>     | coding region           | ENST00000320356 |
| <i>FLT3-TKD</i> | E20                     | ENST00000241453 |
| <i>GATA1</i>    | coding region           | ENST00000376670 |
| <i>IDH1</i>     | E04                     | ENST00000345146 |
| <i>IDH2</i>     | E04                     | ENST00000330062 |
| <i>JAK2</i>     | E12+14                  | ENST00000381652 |
| <i>KIT</i>      | E08+E17                 | ENST00000288135 |
| <i>KRAS</i>     | E02-E03                 | ENST00000256078 |
| <i>MAP2K1</i>   | E01-11                  | ENST00000307102 |
| <i>MPL</i>      | E10                     | ENST00000372470 |
| <i>MYC</i>      | E01-03                  | ENST00000377970 |
| <i>MYD88</i>    | coding region           | ENST00000396334 |
| <i>NOTCH2</i>   | E26, E27, E34           | ENST00000256646 |
| <i>NPM1</i>     | E11                     | ENST00000296930 |
| <i>NRAS</i>     | E02-E03                 | ENST00000369535 |
| <i>PHF6</i>     | coding region           | ENST00000370803 |
| <i>PIGA</i>     | E02-06                  | ENST00000333590 |
| <i>PLCG2</i>    | E12, E19, E20, E24, E30 | ENST00000359376 |
| <i>PTPN11</i>   | E01-E15                 | ENST00000351677 |
| <i>RUNX1</i>    | coding region           | ENST00000344691 |
| <i>SAMHD1</i>   | E01-16                  | ENST00000262878 |
| <i>SETBP1</i>   | E04                     | ENST00000282030 |
| <i>SF3B1</i>    | E13-E16                 | ENST00000335508 |
| <i>SRSF2</i>    | E01                     | ENST00000392485 |
| <i>STAT3</i>    | E20, E21                | ENST00000264657 |
| <i>STAT5B</i>   | E02-E19                 | ENST00000293328 |
| <i>TET2</i>     | coding region           | ENST00000310581 |
| <i>TP53</i>     | E04-10                  | ENST00000269305 |
| <i>U2AF1</i>    | E02+E06                 | ENST00000291552 |
| <i>UBR5</i>     | E58                     | ENST00000293328 |
| <i>WT1</i>      | E07-23                  | ENST00000332351 |
| <i>XPO1</i>     | E14, E15                | ENST00000401558 |
| <i>ZRSR2</i>    | coding region           | ENST00000307771 |

**Table S3: Genes included in panel.** \*For over 90% of given regions a minimal coverage of 400x was achieved. Abbreviations: tyrosine kinase domain, TKD.

**Table S4**

| <i>rearrangement</i> | gene          | mutation       | load (%) | gene        | mutation        | load (%) | gene         | mutation        | load | gene          | VUS            | load (%) |
|----------------------|---------------|----------------|----------|-------------|-----------------|----------|--------------|-----------------|------|---------------|----------------|----------|
| <i>FIP1L1-PDGFR</i>  | <i>RUNX1</i>  | c.521G>A       | 37       | <i>TET2</i> | c.3714_3715 del | 47       |              |                 |      |               |                |          |
| <i>FIP1L1-PDGFR</i>  | <i>ASXL1</i>  | c.2458_2459dup | 38       | <i>BCOR</i> | c.2190dup       | 47       | <i>ETV6</i>  | c.1196_1197 del | 24   | <i>ZRSR2</i>  | c.1332_1343dup | 89       |
| <i>FIP1L1-PDGFR</i>  | <i>DNMT3A</i> | c.1647C>A      | 3        |             |                 |          |              |                 |      |               |                |          |
| <i>FIP1L1-PDGFR</i>  |               |                |          |             |                 |          |              |                 |      | <i>SAMHD1</i> | c.677G>A       | 57       |
| <i>FIP1L1-PDGFR</i>  | <i>TET2</i>   | c.5328dup      | 28       |             |                 |          |              |                 |      |               |                |          |
| <i>FIP1L1-PDGFR</i>  |               |                |          |             |                 |          |              |                 |      | <i>PTPN11</i> | c.1658C>T      | 46       |
| <i>FIP1L1-PDGFR</i>  |               |                |          |             |                 |          |              |                 |      | <i>ETV6</i>   | c.1193T>G      | 56       |
| <i>FIP1L1-PDGFR</i>  | <i>DNMT3A</i> | c.2387G>A      | 24       |             |                 |          |              |                 |      |               |                |          |
| <i>ETV6-PDGFR</i>    | <i>BCOR</i>   | c.4127del      | 46       |             |                 |          |              |                 |      |               |                |          |
| <i>ETV6-PDGFR</i>    | <i>STAT5B</i> | c.1882A>T      | 14       |             |                 |          |              |                 |      |               |                |          |
| <i>TNIP1-PDGFR</i>   | <i>DNMT3A</i> | c.2192del      | 41       | <i>NRAS</i> | c.35G>A         | 9        | <i>ZRSR2</i> | c.284C>T        | 17   |               |                |          |
| <i>ZMYM2-FGFR1</i>   | <i>RUNX1</i>  | c.239G>A       | 11       |             |                 |          |              |                 |      |               |                |          |
| <i>ZMYM2-FGFR1</i>   | <i>RUNX1</i>  | c.422G>A       | 23       |             |                 |          |              |                 |      |               |                |          |
| <i>BCR-FGFR1</i>     | <i>RUNX1</i>  | c.955dup       | 33       |             |                 |          |              |                 |      |               |                |          |
| <i>FGFR1*</i>        | <i>RUNX1</i>  | c.986_989 dup  | 11       |             |                 |          |              |                 |      |               |                |          |
| <i>ZMYM2-FGFR1</i>   | <i>RUNX1</i>  | c.419G>A       | 60       |             |                 |          |              |                 |      |               |                |          |
| <i>PCM1-JAK2</i>     |               |                |          |             |                 |          |              |                 |      | <i>PTPN11</i> | c.1682C>T      | 50       |
| <i>PCM1-JAK2</i>     | <i>TET2</i>   | c.2717del      | 37       |             |                 |          |              |                 |      |               |                |          |

**Table S4: Variants identified by panel sequencing.** \* The exact fusion is unknown. The involvement of *FGFR1* was detected by FISH. Mutation load was calculated as mutated/all reads (in %). Abbreviations: variant of uncertain significance, VUS.

**Table S5**

| rearrangement type   | state           | gene          | mutation                                                         | load (%)          |           |
|----------------------|-----------------|---------------|------------------------------------------------------------------|-------------------|-----------|
| <b>FIP1L1-PDGFRA</b> | ID              | <i>ASXL1</i>  | c.2458_2459dup                                                   | p.Asp820Glufs*5   | 38        |
|                      |                 | <i>BCOR</i>   | c.2190dup                                                        | p.Pro731Thrfs*9   | 47        |
|                      |                 | <i>ETV6</i>   | c.1196_1197del                                                   | p.Arg399Profs*26  | 24        |
| <b>type B</b>        | CR (imatinib)   | <i>ASXL1</i>  | c.2458_2459dup                                                   | p.Asp820Glufs*5   | 0         |
|                      |                 | <i>BCOR</i>   | c.2190dup                                                        | p.Pro731Thrfs*9   | 0         |
|                      |                 | <i>ETV6</i>   | c.1196_1197del                                                   | p.Arg399Profs*26  | 0         |
| <b>FIP1L1-PDGFRA</b> | ID              | <i>RUNX1</i>  | c.521G>A                                                         | p.Arg174Gln       | 37        |
|                      |                 | <i>TET2</i>   | c.3714_3715del                                                   | p.Leu1240Glyfs*2  | 47        |
|                      |                 | <b>type B</b> | CR (imatinib)                                                    | <i>RUNX1</i>      | c.521G>A  |
|                      |                 | <i>TET2</i>   | c.3714_3715del                                                   | p.Leu1240Glyfs*2  | 0         |
| <b>FIP1L1-PDGFRA</b> | ID              | <i>DNMT3A</i> | c.1647C>A                                                        | p.Cys549*         | 3         |
|                      |                 | <b>type A</b> | CR (imatinib)                                                    | <i>DNMT3A</i>     | c.1647C>A |
| <b>FIP1L1-PDGFRA</b> | ID              | <i>TET2</i>   | c.5328dup                                                        | p.Leu1777Serfs*12 | 28        |
|                      |                 | <b>type A</b> | CR (imatinib)                                                    | <i>TET2</i>       | c.5328dup |
| <b>FIP1L1-PDGFRA</b> | ID              | <i>DNMT3A</i> | c.2387G>A                                                        | p.Gly796Asp       | 24        |
|                      |                 | <b>type A</b> | CR (imatinib)                                                    | <i>DNMT3A</i>     | c.2387G>A |
| <b>ETV6-PDGFRB</b>   | ID              | <i>BCOR</i>   | c.4127del                                                        | p.Gly1376Aspfs*4  | 46        |
|                      |                 | <b>type B</b> | 10-fold reduction of <i>PDGFRB</i> expression (imatinib + GMALL) | <i>BCOR</i>       | c.4127del |
| <b>BCR-FGFR1</b>     | ID              | <i>RUNX1</i>  | c.955dup                                                         | p.Arg319Profs*254 | 33        |
|                      |                 | <b>type C</b> | all cells positive in chromosome banding analysis                | <i>RUNX1</i>      | c.955dup  |
| <b>ZMYM2-FGFR1</b>   | treatment naive | <i>RUNX1</i>  | c.239G>A                                                         | p.Arg80His        | 11        |
|                      |                 | <b>type C</b> | 74 cells positive by FISH (ponatinib)                            | <i>RUNX1</i>      | c.239G>A  |

**Table S5: Follow-up for patients with mutations.** We performed FISH, chromosome banding analysis or *PDGFRB* expression testing for post-treatment samples. Negative RT-PCR was used for complete molecular remission. Treatment information is given, if available, in brackets. Type A are mutations, which developed independently or prior to the rearrangements. Type B and type C are mutations derived from the MLN-Eo clone. Type C indicates subclones, which strongly expanded. Abbreviations: initial diagnosis, ID; complete remission, CR; German Multicenter Study Group for Adult Acute Lymphoblastic Leukemia, GMALL.

**Figure S1**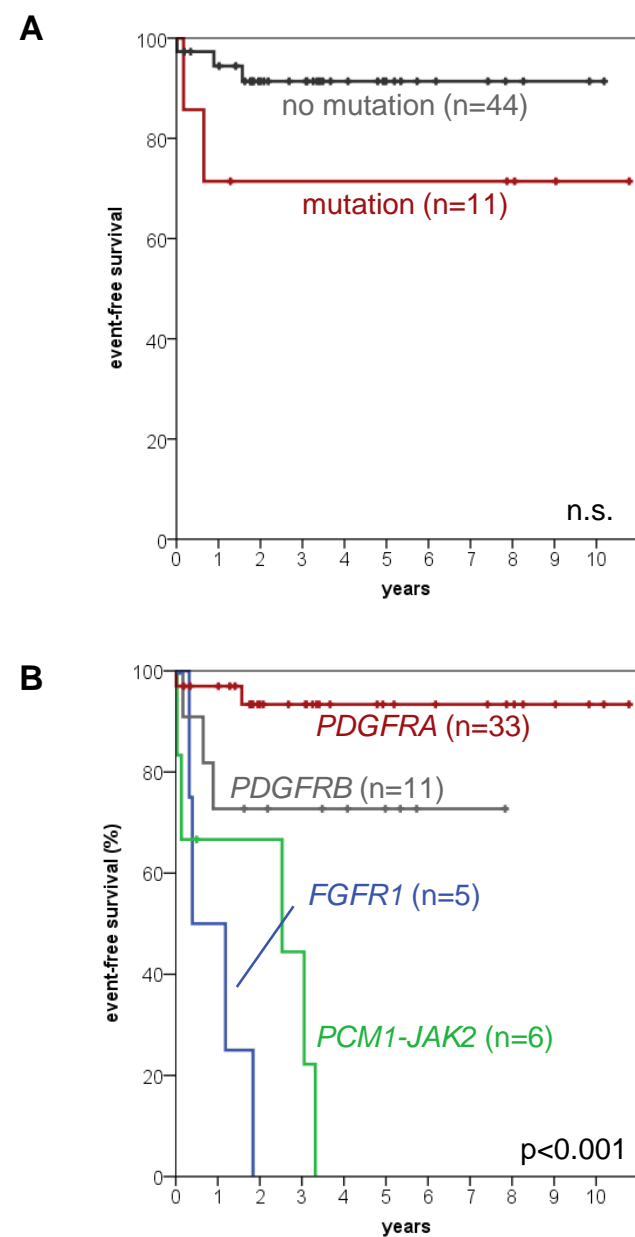

| pairwise comparison Log Rank (Mantel Cox) |                  |               |               |
|-------------------------------------------|------------------|---------------|---------------|
| significance                              | <i>PCM1-JAK2</i> | <i>PDGFRA</i> | <i>PDGFRB</i> |
| <i>FGFR1</i>                              | 0.201            | 0.000         | 0.017         |
| <i>PCM1-JAK2</i>                          |                  | 0.000         | 0.021         |
| <i>PDGFRA</i>                             |                  |               | 0.063         |

**Figure S1: Event-free survival (EFS).** Kaplan–Meier curves show the effect of A) mutations within the *PDGFRA* and *PDGFRB* subgroup and B) fusions types on EFS. Significance was calculated by Log Rank (Mantel Cox) and also compared pairwise in figure B. Indication to change treatment (incl. allogeneic stem cell transplantation) was counted as event. Abbreviations: not significant, n.s..



# Figure S2

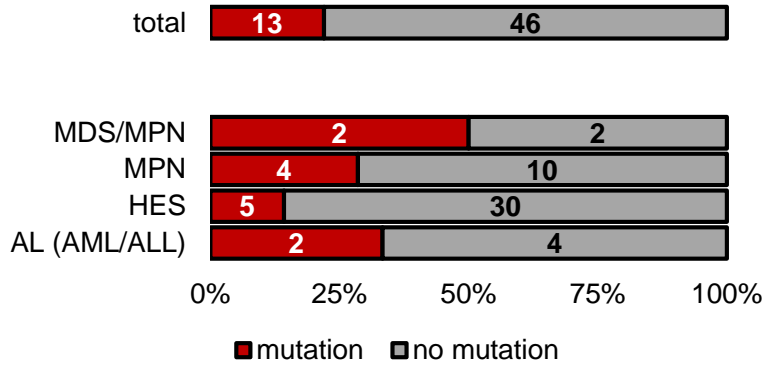

**Figure S2: Mutation distribution according to initial final diagnosis.** Absolute numbers are indicated in bars. Final diagnosis data was not available for one case and one case is not shown, because chronic eosinophilic leukemia was assigned as diagnosis only to one patient. Abbreviations: Acute leukemia, AL (includes acute lymphoblastic leukemia, ALL; acute myeloid leukemia, AML); hypereosinophilic syndrome, HES; myelodysplastic/myeloproliferative neoplasms, MDS/MPN; myeloproliferative neoplasms, MPN.
