# Supplementary material
Source: PubMed Central journal article supplement (PMC6068021)
Supplement: 2017_187302-Disclosures_and_Contributions.pdf [file 2017_187302-Disclosures_and_Contributions.pdf]

Haematologica  
HAEMATOL/2017/187302  
Version 3

Molecular genetic characterization of myeloid/lymphoid neoplasms  
associated with eosinophilia and rearrangement of PDGFRA,  
PDGFRB, FGFR1 or PCM1-JAK2

Constance Baer, Verena Muehlbacher, Wolfgang Kern, Claudia  
Haferlach, and Torsten Haferlach

Disclosures: CB, VM: Employment by MLL Munich Leukemia Laboratory; WK, CH, TH:  
Equity ownership of MLL Munich Leukemia Laboratory

Contributions: CB, VM, CH analyzed the data; CB, WK, CH, TH designed the study; CB,  
TH wrote the manuscript
